# Supplementary material for: Truth or lie: Exploring the language of deception
Source: PubMed Central journal article supplement (PMC9894434; doi:10.1371/journal.pone.0281179), 2023-02-02
Supplement: pone.0281179.s002.pdf [file pone.0281179.s002.pdf]

**S1 Table. Means and standard deviations for crucial variables by truth/lie and written/transcribed conditions.**

|                           | TRUTH   |         | LIE     |         | WRITTEN |         | TRANSCRIBED |          |
|---------------------------|---------|---------|---------|---------|---------|---------|-------------|----------|
|                           | M       | SD      | M       | SD      | M       | SD      | M           | SD       |
| MHD                       | 2,607   | ,614    | 2,523   | ,584    | 2,347   | ,614    | 2,790       | ,629     |
| MDD                       | 3,011   | ,513    | 2,946   | ,523    | 2,718   | ,513    | 3,247       | ,468     |
| FOG                       | 14,328  | 6,050   | 13,336  | 5,140   | 13,387  | 6,050   | 14,294      | 4,761    |
| Sentence length           | 9,57    | 5,829   | 8,50    | 4,797   | 7,41    | 5,829   | 10,71       | 6,204    |
| Characters                | 1395,44 | 973,672 | 1138,29 | 773,501 | 812,72  | 973,672 | 1735,71     | 1008,376 |
| Tokens                    | 246,74  | 179,689 | 201,20  | 141,409 | 315,09  | 179,689 | 315,09      | 182,221  |
| LCM*                      | 8,639   | 14,306  | 6,945   | 9,211   | 4,677   | 14,306  | 11,009      | 15,803   |
| DAV*                      | ,206    | ,192    | ,188    | ,145    | ,143    | ,192    | ,253        | ,199     |
| IAV*                      | ,222    | ,154    | ,204    | ,131    | ,181    | ,154    | ,246        | ,156     |
| SV*                       | ,351    | ,238    | ,330    | ,212    | ,253    | ,238    | ,431        | ,249     |
| LCM_ADJ*                  | ,008    | ,007    | ,008    | ,008    | ,008    | ,007    | ,009        | ,007     |
| Non-third-person-pronoun* | ,007    | ,008    | ,007    | ,009    | ,006    | ,008    | ,008        | ,008     |
| Third-person-pronoun*     | ,012    | ,011    | ,014    | ,013    | ,015    | ,011    | ,011        | ,011     |
| Infinitives*              | ,027    | ,019    | ,031    | ,020    | ,028    | ,019    | ,030        | ,017     |
| Negations*                | ,025    | ,016    | ,026    | ,019    | ,024    | ,016    | ,027        | ,017     |
| Generalizations*          | ,004    | ,006    | ,005    | ,008    | ,004    | ,006    | ,005        | ,007     |
| Positive sentiment*       | ,050    | ,026    | ,055    | ,030    | ,058    | ,026    | ,047        | ,023     |
| Negative_sentiment*       | ,028    | ,021    | ,023    | ,020    | ,030    | ,021    | ,020        | ,014     |

\* Variables divided by the number of tokens.
