# Supplementary material for: Truth or lie: Exploring the language of deception
Source: PubMed Central journal article supplement (PMC9894434; doi:10.1371/journal.pone.0281179), 2023-02-02
Supplement: pone.0281179.s003.pdf [file pone.0281179.s003.pdf]

S2 Table. Summary of regression models

| Predictors                                              | LCM*          |               |        | positive sentiment* |               |        | negative sentiment* |               |        | MHD           |               |        | MDD           |               |        | FOG           |               |        |
|---------------------------------------------------------|---------------|---------------|--------|---------------------|---------------|--------|---------------------|---------------|--------|---------------|---------------|--------|---------------|---------------|--------|---------------|---------------|--------|
|                                                         | Estimates     | CI            | p      | Estimates           | CI            | p      | Estimates           | CI            | p      | Estimates     | CI            | p      | Estimates     | CI            | p      | Estimates     | CI            | p      |
| <b>Intercept</b>                                        | 1.83          | 1.78 – 1.87   | <0.001 | 0.05                | 0.05 – 0.05   | <0.001 | 0.02                | 0.02 – 0.03   | <0.001 | 1.26          | 1.25 – 1.27   | <0.001 | 1.37          | 1.37 – 1.38   | <0.001 | 2.64          | 2.62 – 2.66   | <0.001 |
| T_vs_L                                                  | -0.12         | -0.18 – -0.06 | <0.001 | 0.01                | 0.00 – 0.01   | <0.001 | -0.00               | -0.01 – -0.00 | <0.001 | -0.02         | -0.04 – -0.01 | <0.001 | -0.02         | -0.03 – -0.01 | 0.001  | -0.06         | -0.09 – -0.03 | <0.001 |
| W_vs_T                                                  | 0.62          | 0.56 – 0.68   | <0.001 | -0.01               | -0.01 – -0.01 | <0.001 | -0.01               | -0.01 – -0.01 | <0.001 | 0.12          | 0.11 – 0.14   | <0.001 | 0.13          | 0.12 – 0.14   | <0.001 | 0.09          | 0.06 – 0.11   | <0.001 |
| T_vs_L*<br>W_vs_T                                       | -0.16         | -0.27 – -0.04 | 0.011  | 0.00                | -0.00 – -0.01 | 0.451  | 0.00                | -0.00 – -0.01 | 0.112  | -0.00         | -0.03 – -0.02 | 0.716  | -0.00         | -0.02 – -0.02 | 0.873  | -0.02         | -0.07 – -0.04 | 0.539  |
| <b>Random Effects</b>                                   |               |               |        |                     |               |        |                     |               |        |               |               |        |               |               |        |               |               |        |
| $\sigma^2$                                              | 0.35          |               |        | 0.00                |               |        | 0.00                |               |        | 0.02          |               |        | 0.01          |               |        | 0.07          |               |        |
| $\tau_{00}$                                             | 0.13          |               |        | 0.00                |               |        | 0.00                |               |        | 0.01          |               |        | 0.00          |               |        | 0.02          |               |        |
| ICC                                                     | 0.27          |               |        | 0.14                |               |        | 0.13                |               |        | 0.26          |               |        | 0.21          |               |        | 0.23          |               |        |
| N                                                       | 415           |               |        | 415                 |               |        | 415                 |               |        | 415           |               |        | 415           |               |        | 415           |               |        |
| Observations                                            | 1497          |               |        | 1497                |               |        | 1497                |               |        | 1497          |               |        | 1497          |               |        | 1497          |               |        |
| Marginal R <sup>2</sup> /<br>Conditional R <sup>2</sup> | 0.176 / 0.398 |               |        | 0.047 / 0.182       |               |        | 0.072 / 0.191       |               |        | 0.148 / 0.369 |               |        | 0.272 / 0.424 |               |        | 0.028 / 0.256 |               |        |

T-truth, L-lie, W-written, T-transcribed. \* variables scaled (divided by the number of tokens)
